# Supplementary material for: Large-scale state-dependent membrane remodeling by a transporter protein
Source: eLife journal article supplement (doi:10.7554/elife.50576), 2019-12-19
Supplement: supp [file elife-50576-supp-v1.zip]

Archive with 10 entries (10 files):
- elife_poa_e50576_Figure_7_figure_supplement_1.tif
- elife_poa_e50576_Figure_4_figure_supplement_1.tif
- elife_poa_e50576_Video_1.mpg
- elife_poa_e50576_Figure_5_figure_supplement_1.tif
- elife_poa_e50576_Video_2.mpg
- elife_poa_e50576_Figure_4_figure_supplement_2.tif
- elife_poa_e50576_Figure_6_figure_supplement_1.tif
- elife_poa_e50576_Video_3.mpg
- elife_poa_e50576_Transparent_Reporting_File.pdf
- elife_poa_e50576_Figure_1_figure_supplement_1.tif
