# Supplementary figures and images for: Large-scale state-dependent membrane remodeling by a transporter protein
Source: eLife journal article supplement (doi:10.7554/elife.50576), 2019-12-19

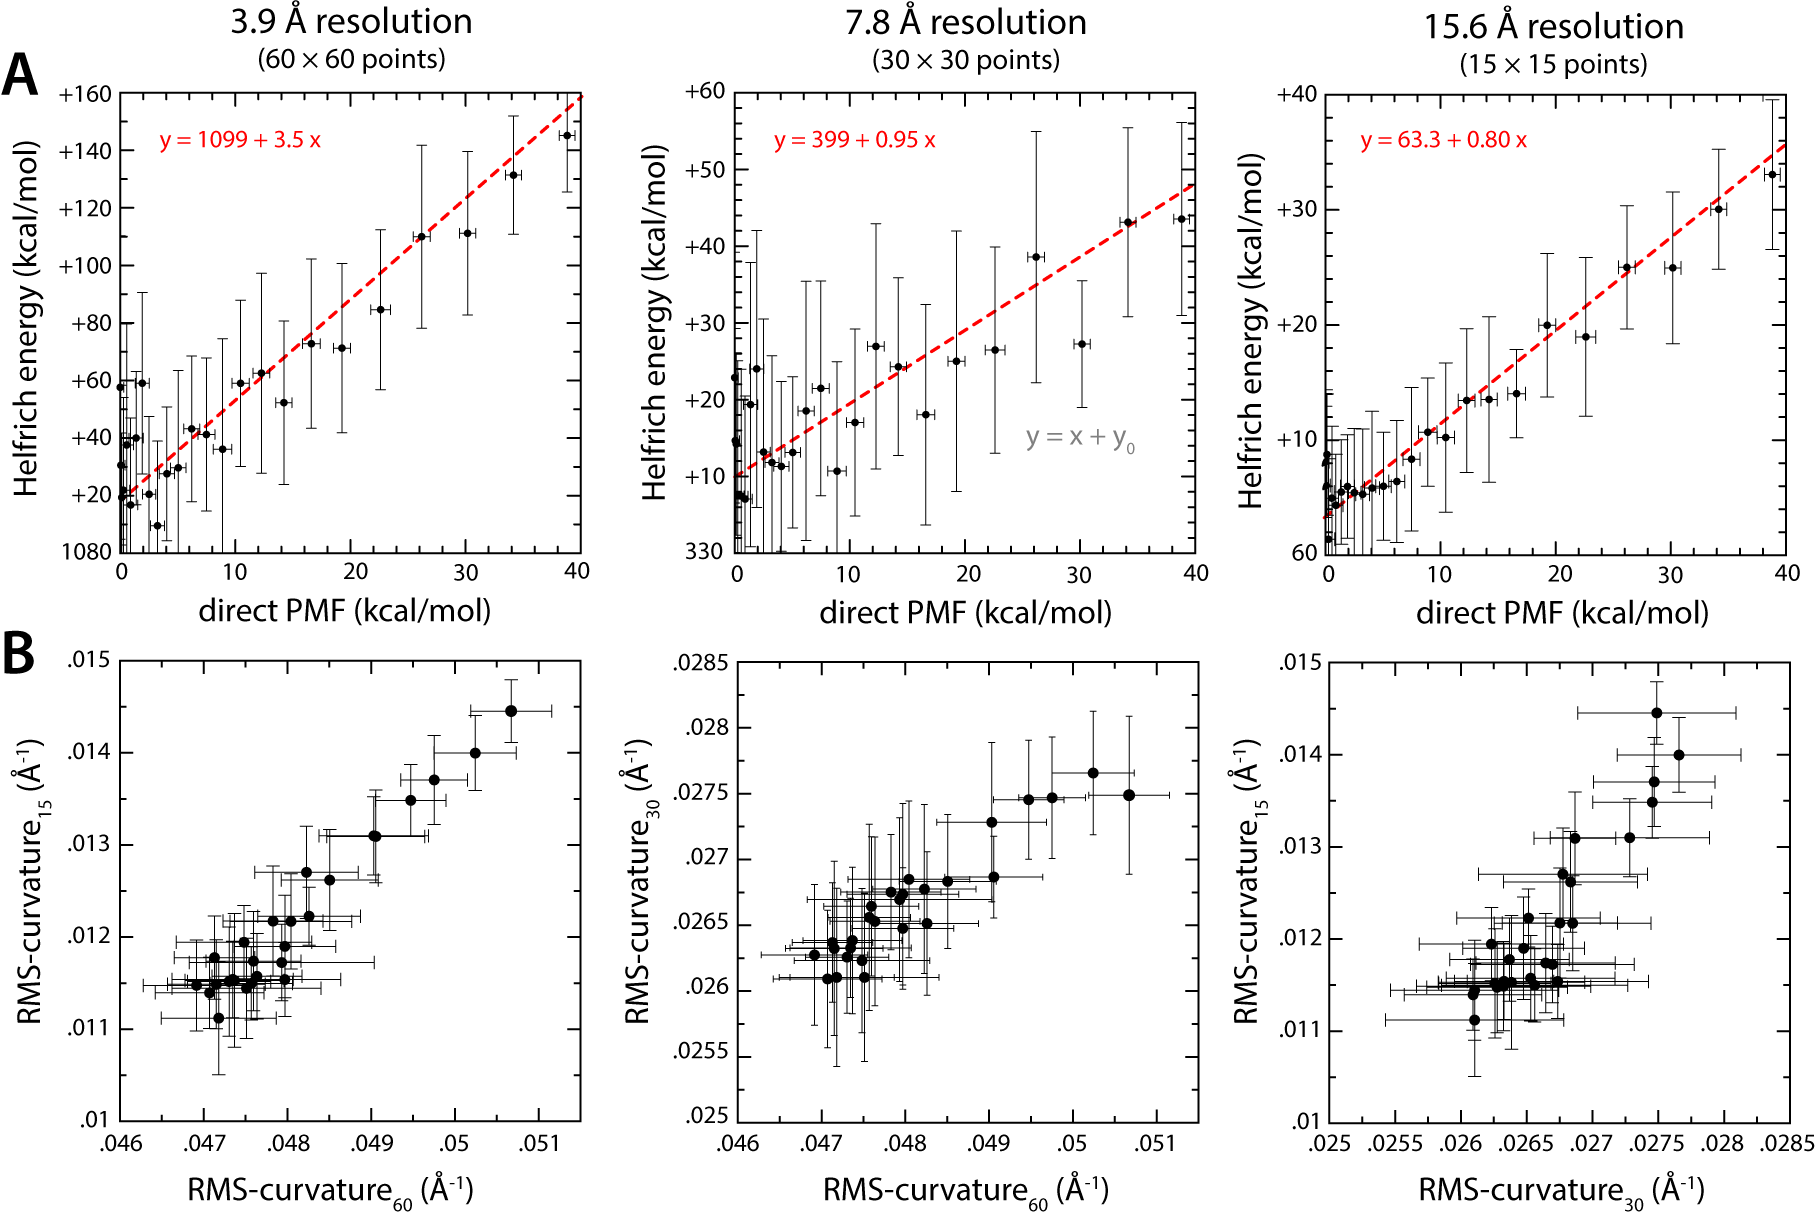

Supplement: supp [file elife-50576-supp-v1.zip › elife_poa_e50576_Figure_7_figure_supplement_1.tif]

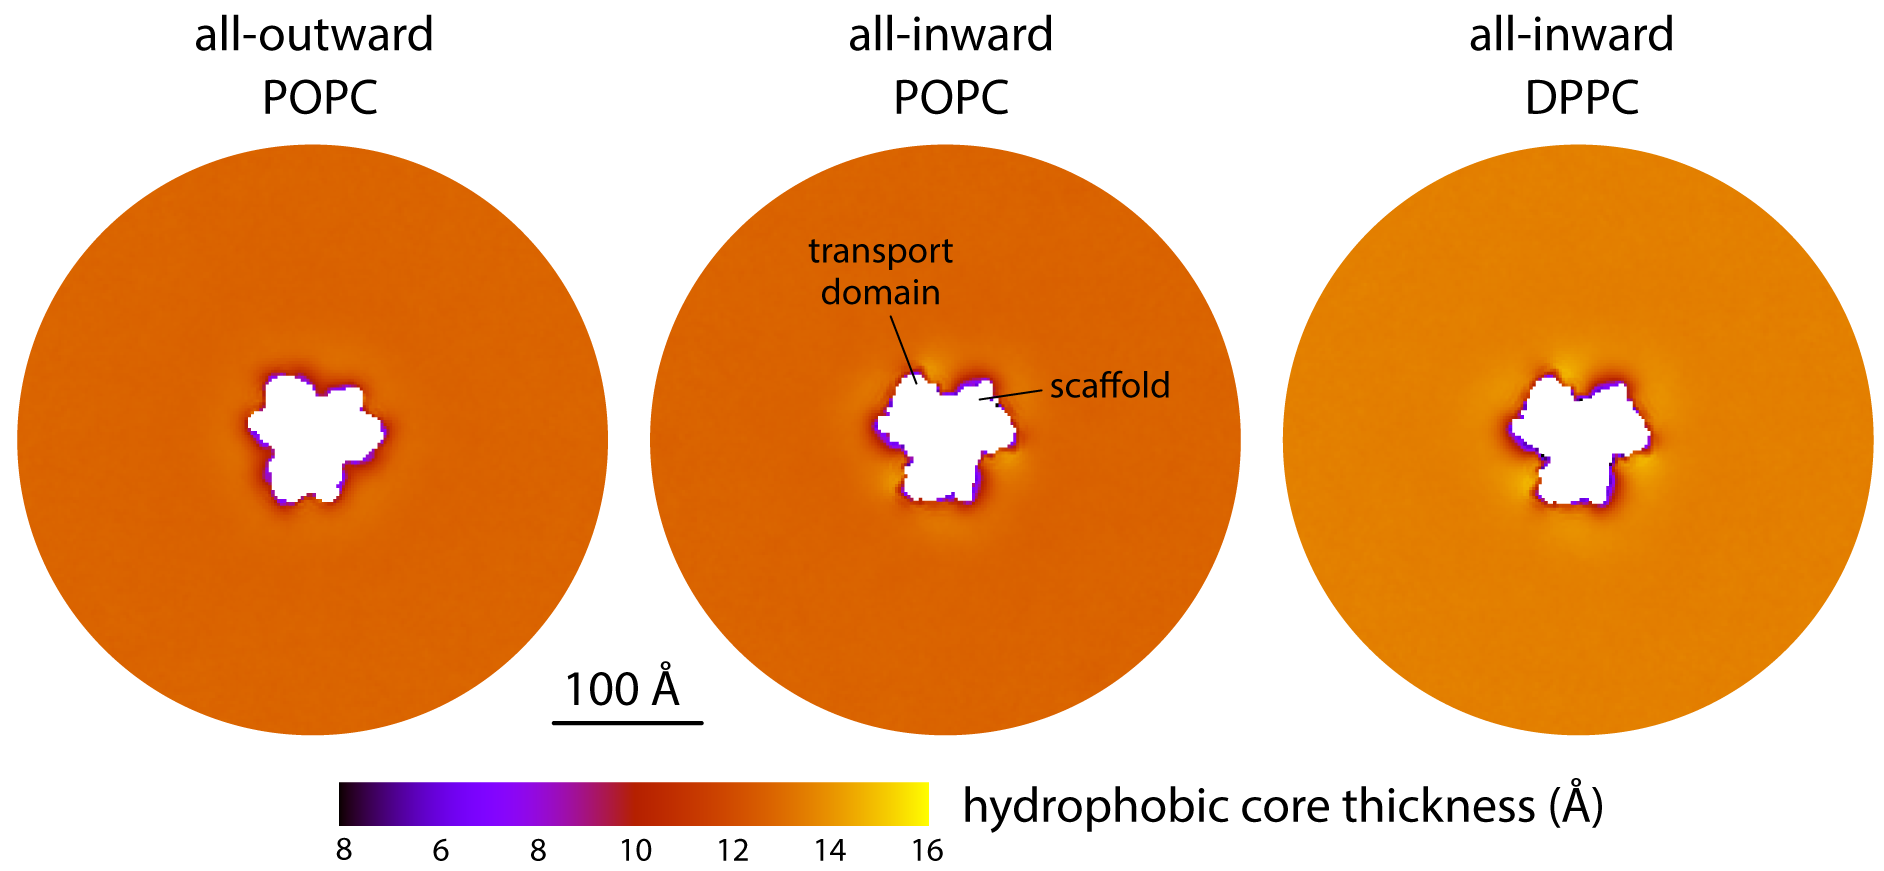

Supplement: supp [file elife-50576-supp-v1.zip › elife_poa_e50576_Figure_4_figure_supplement_1.tif]

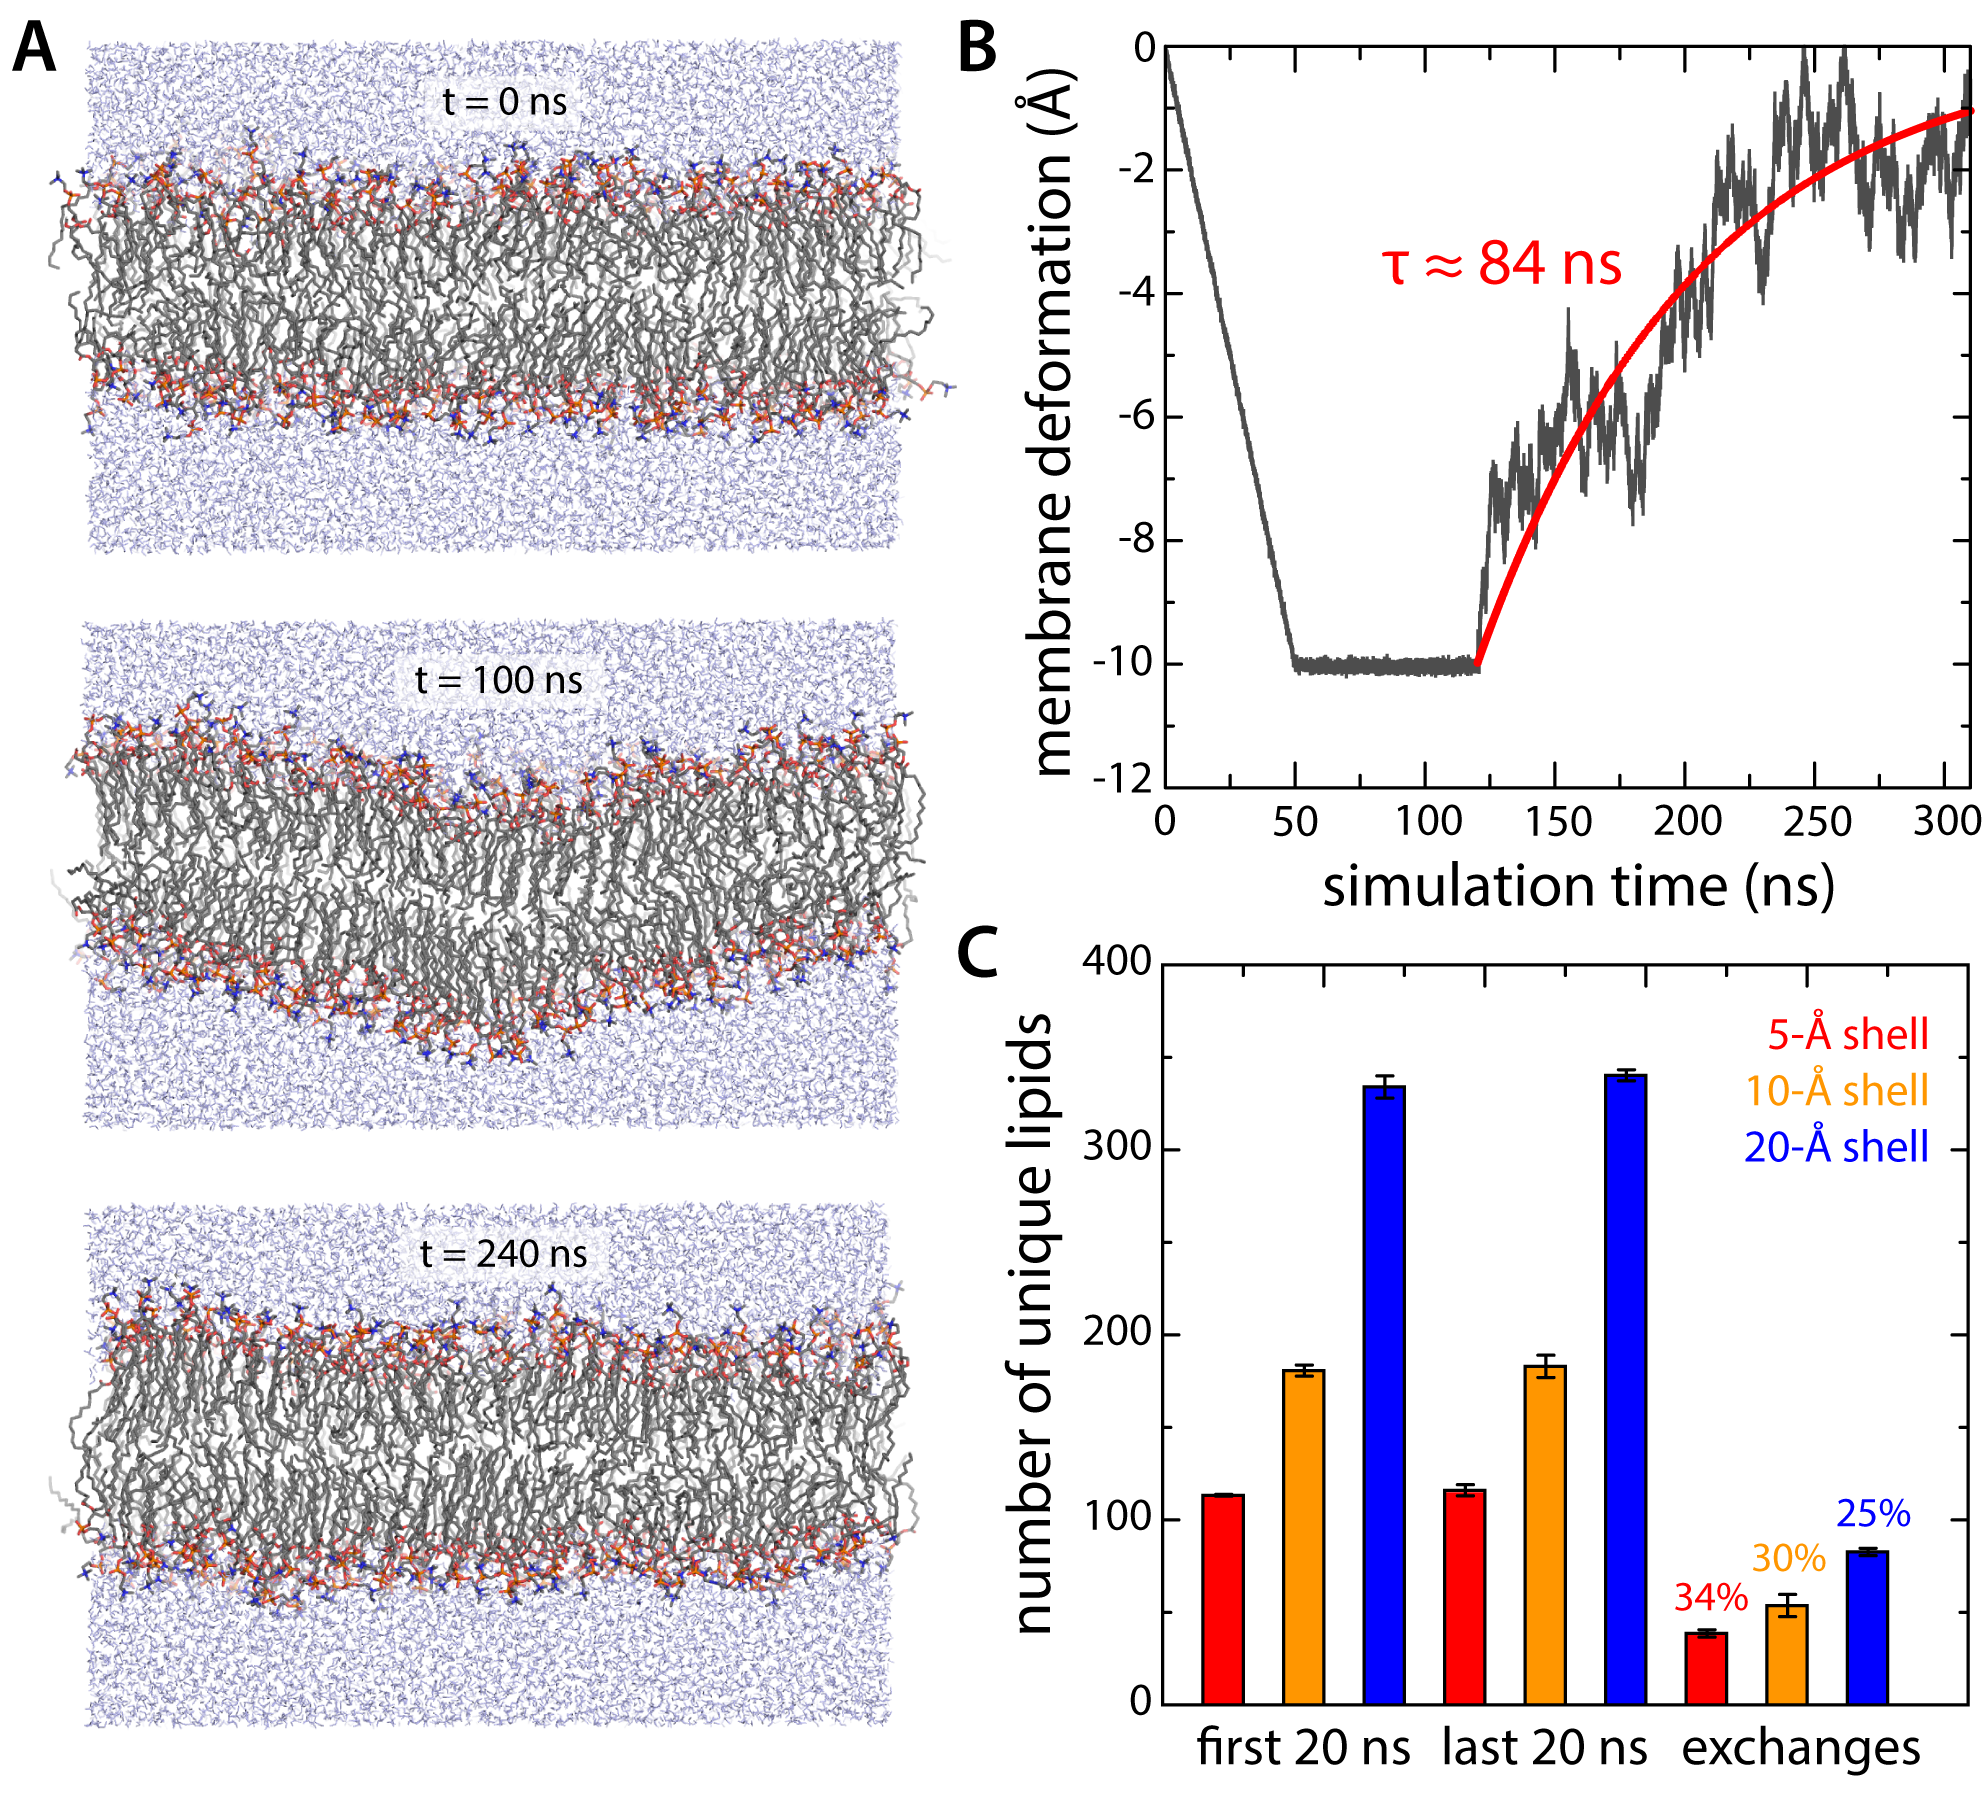

Supplement: supp [file elife-50576-supp-v1.zip › elife_poa_e50576_Figure_5_figure_supplement_1.tif]

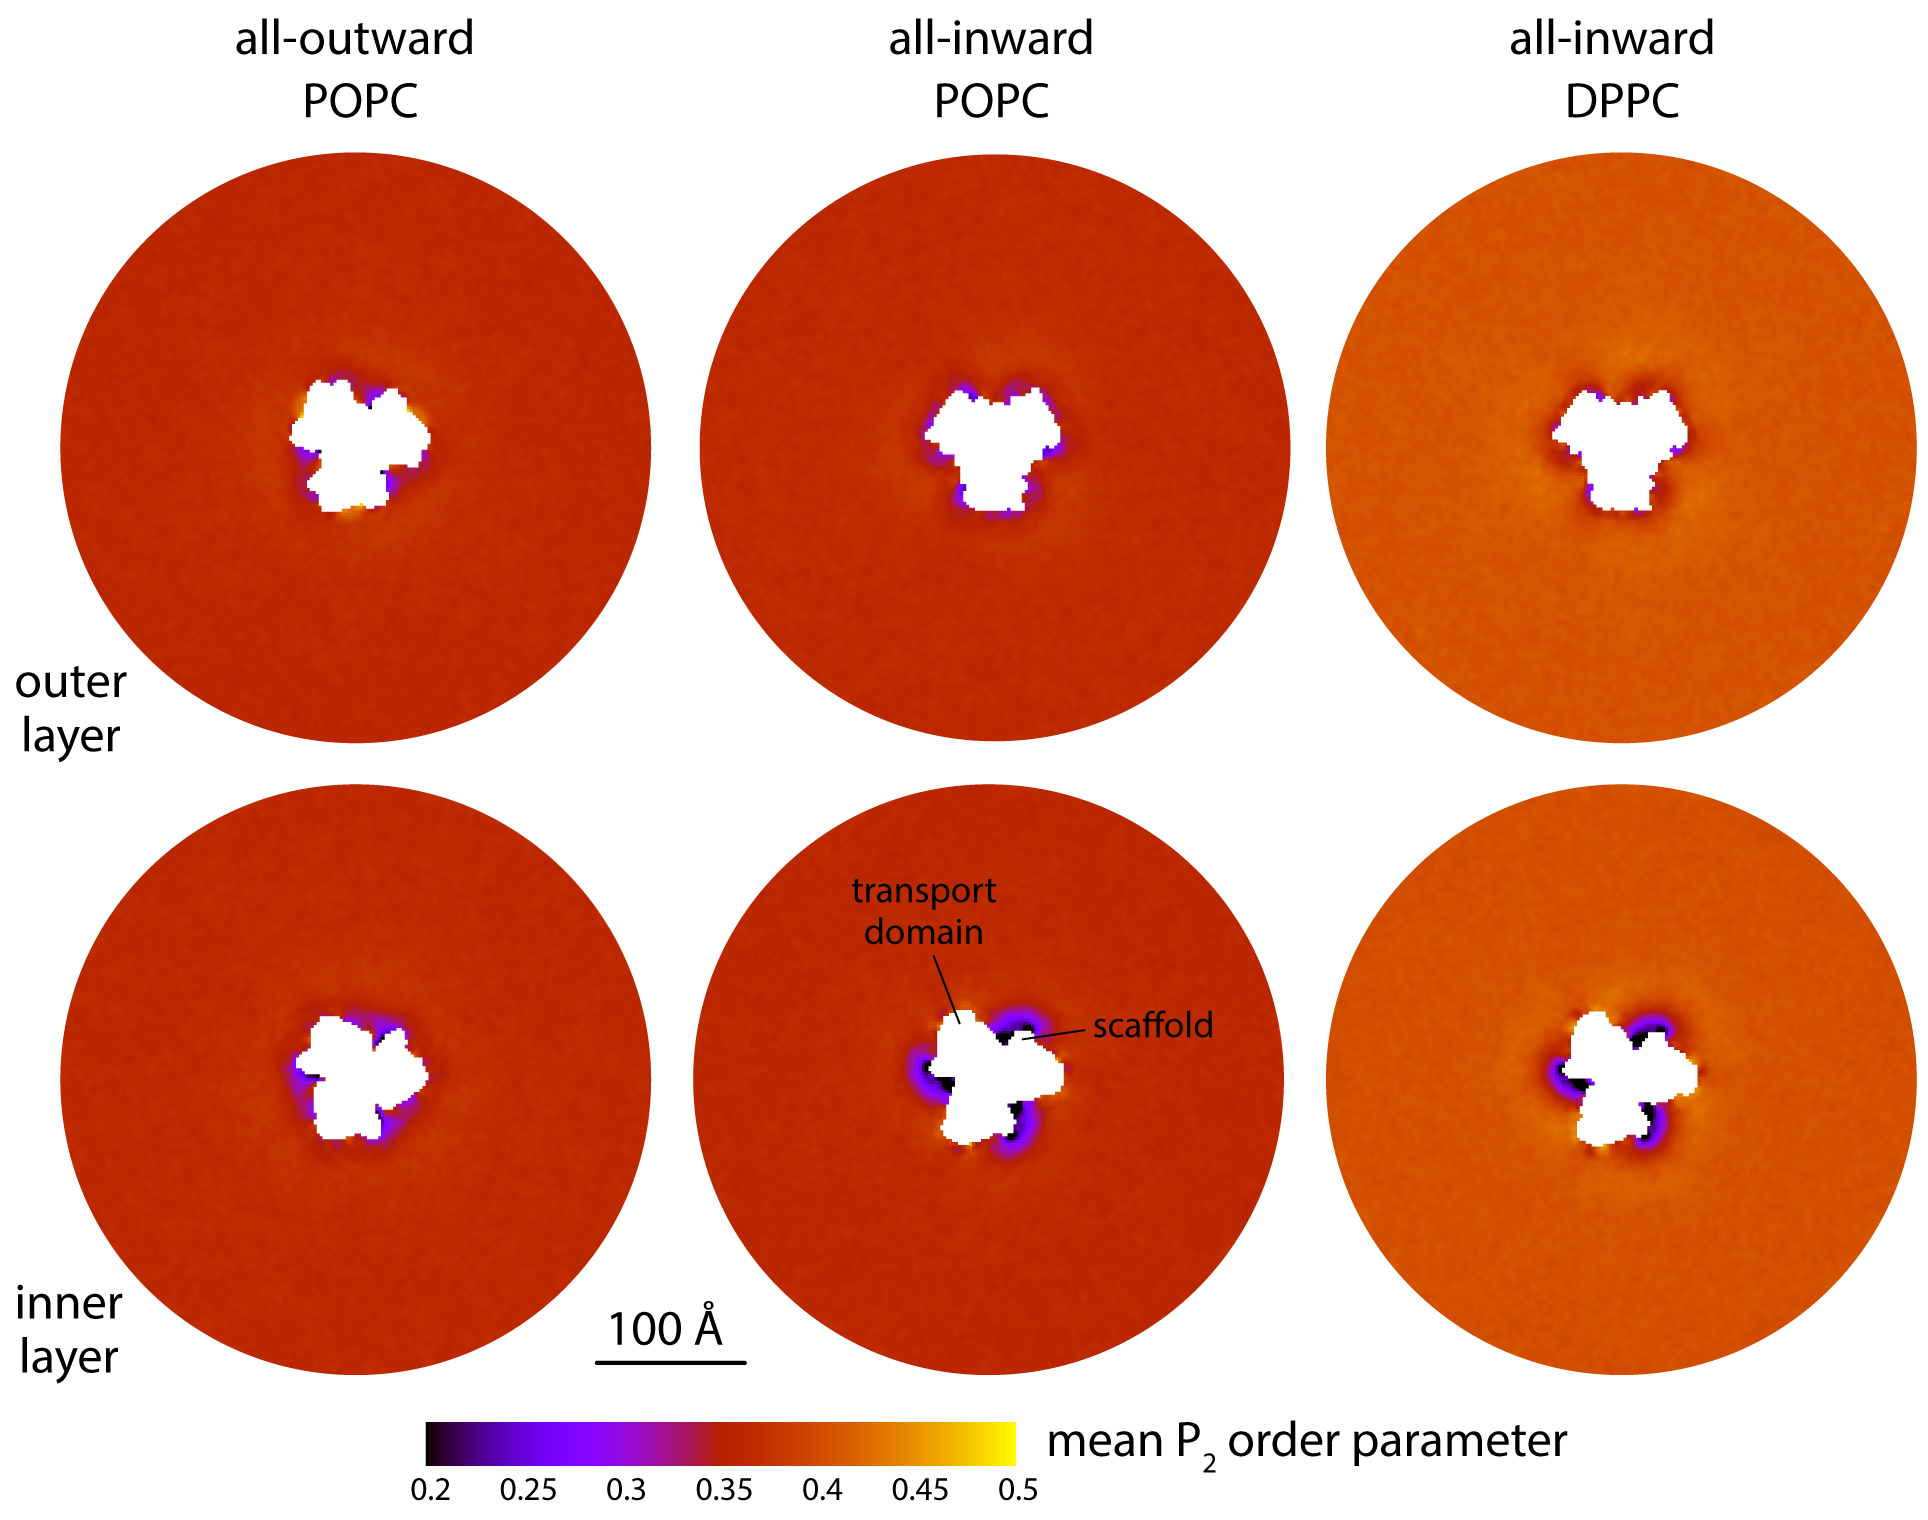

Supplement: supp [file elife-50576-supp-v1.zip › elife_poa_e50576_Figure_4_figure_supplement_2.tif]

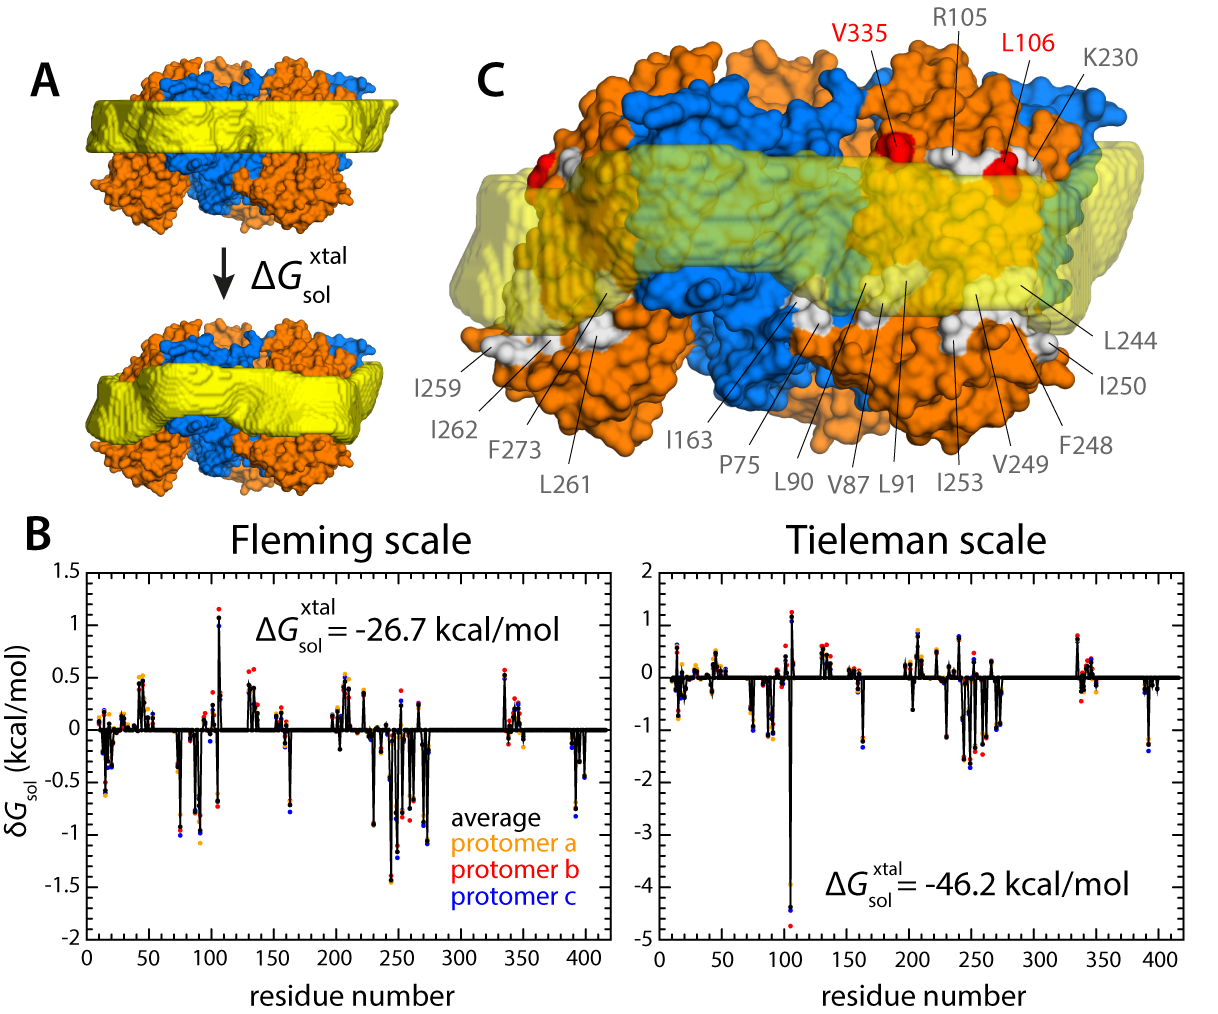

Supplement: supp [file elife-50576-supp-v1.zip › elife_poa_e50576_Figure_6_figure_supplement_1.tif]

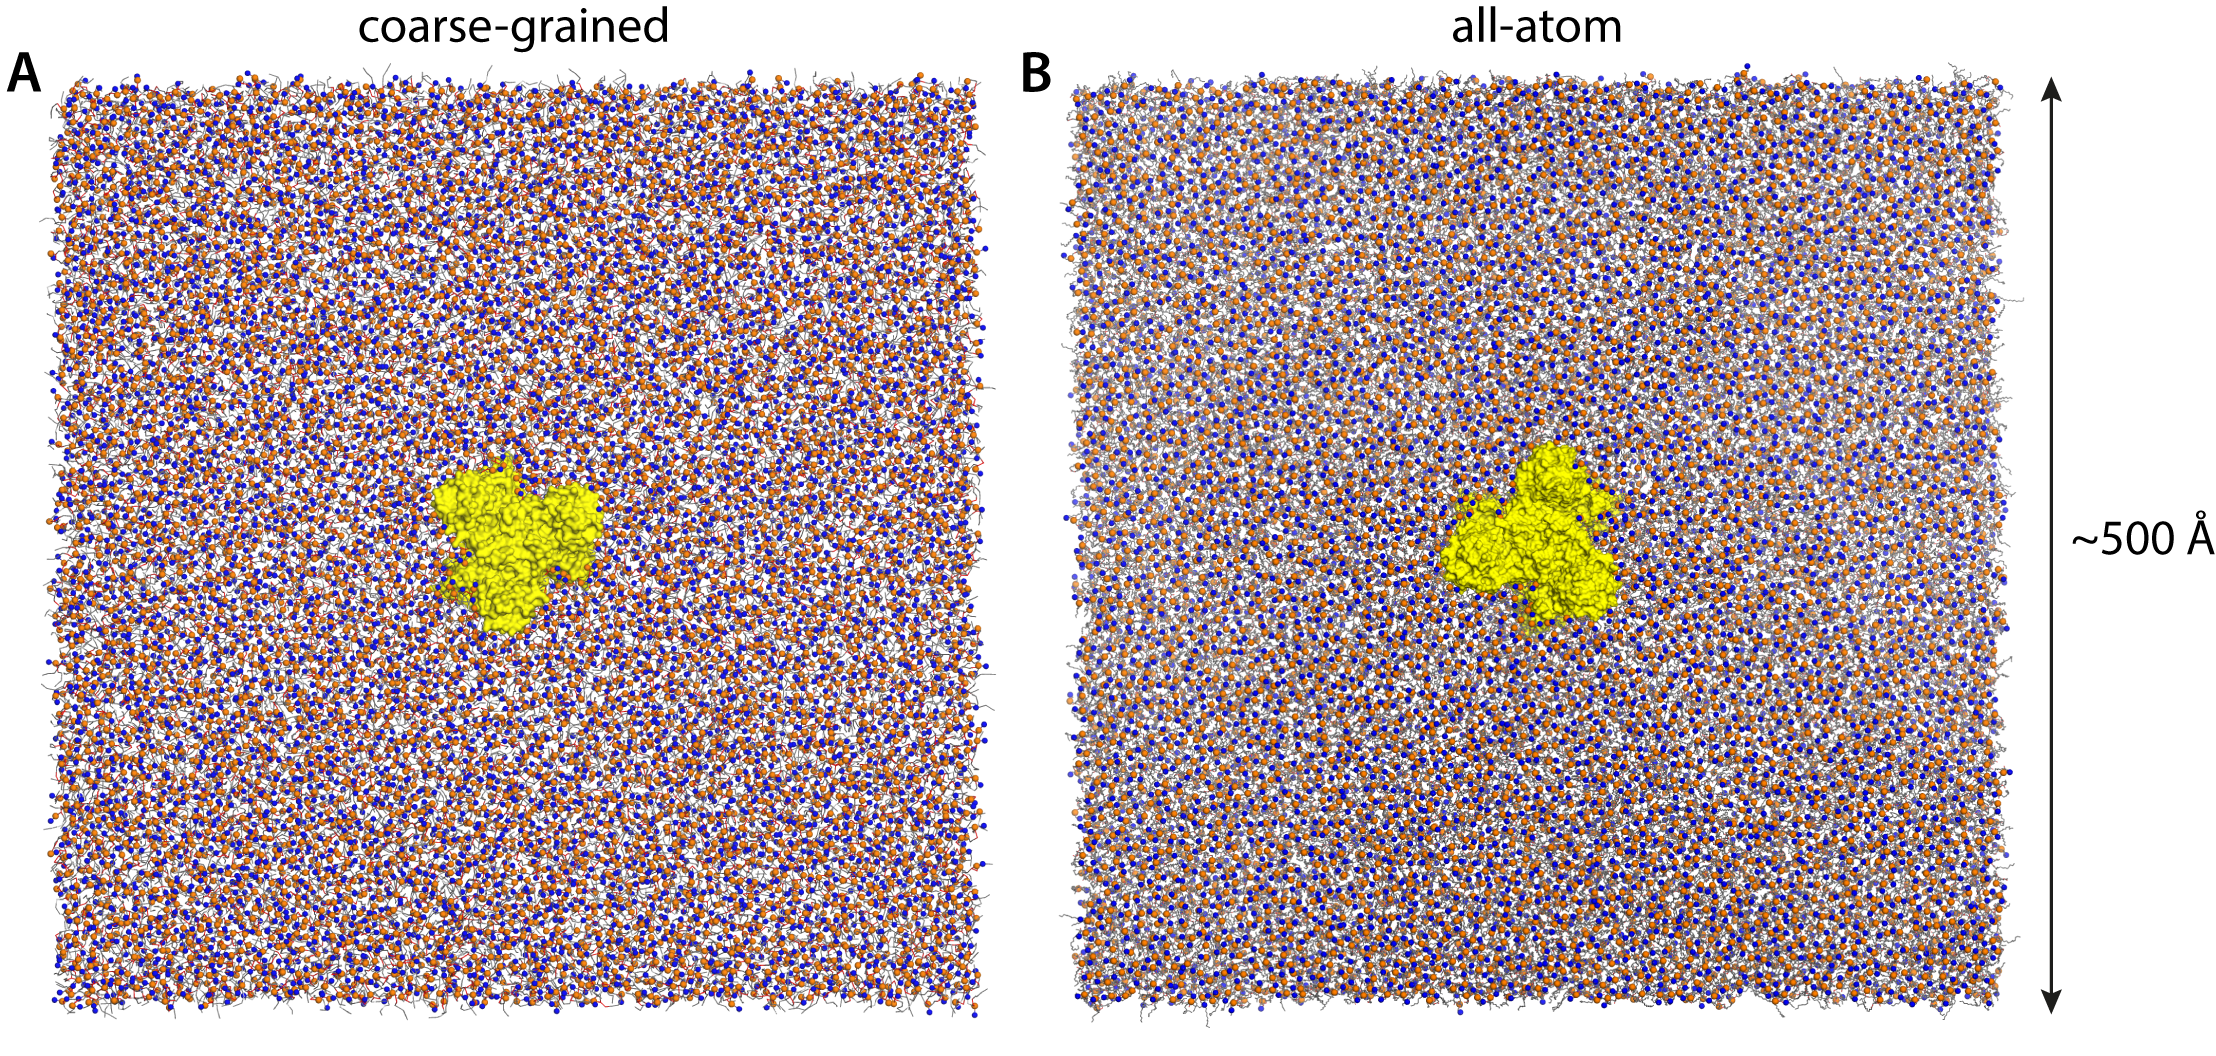

Supplement: supp [file elife-50576-supp-v1.zip › elife_poa_e50576_Figure_1_figure_supplement_1.tif]
